# Supplementary material for: Graphene enhanced charge transfer in ITO optoelectronic synapses for artificial vision systems
Source: Royal Society of Chemistry journal article supplement (doi:10.1039/d4tc01913j), 2024-01-01
Supplement: d4tc01913j1.pdf [file d4tc01913j1.pdf]

## Graphene enhanced charge transfer ITO optoelectronic synapse for artificial vision

Jiran Liang,<sup>\*,1,3</sup> Xuan Yu,<sup>1,2,3</sup> Chuantong Cheng,<sup>\*,2,4</sup> Beiju Huang,<sup>\*,2,4</sup> Zidong Wang<sup>2,4</sup>

Liting Huang<sup>2,4</sup>

<sup>1</sup>School of Microelectronics, Tianjin University, Tianjin 300072, China

<sup>2</sup>The State Key Laboratory on Integrated Optoelectronics, Institute of Semiconductors,  
Chinese Academy of Sciences, Beijing 100083, China.

<sup>3</sup>Tianjin Key Laboratory of Imaging and Sensing Microelectronic Technology, Tianjin  
University, Tianjin 300072, China

<sup>4</sup>College of Materials Science and Opto-Electronic Technology, University of Chinese  
Academy of Sciences, Beijing 100049, People's Republic of China.

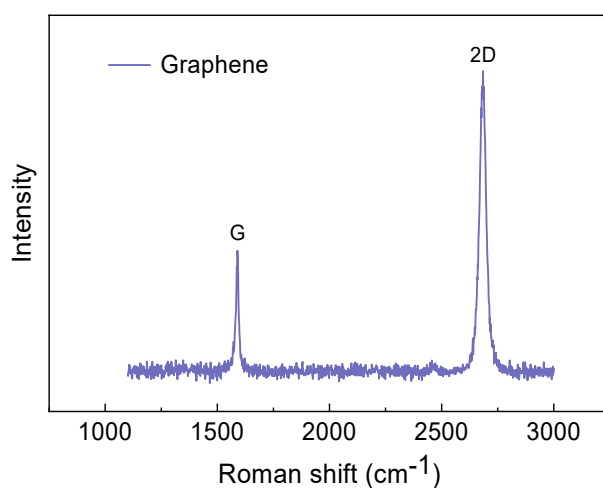

**Figure S1.** Graphene Raman Spectrum Image.

The degree of defects in graphene is related to the D peak at 1350cm<sup>-1</sup>. As shown in Figure S1, the D peak of graphene is not obvious, indicating a lower degree of

internal defects in graphene. The number of layers of graphene is mainly determined by the ratio of the intensity of the G peak at  $1589.53\text{cm}^{-1}$  and the 2D peak at  $2684.28\text{cm}^{-1}$ . The ratio of  $I_G/I_{2D}$  is approximately 0.402, indicating that the number of graphene layers is a single layer. <sup>1</sup>

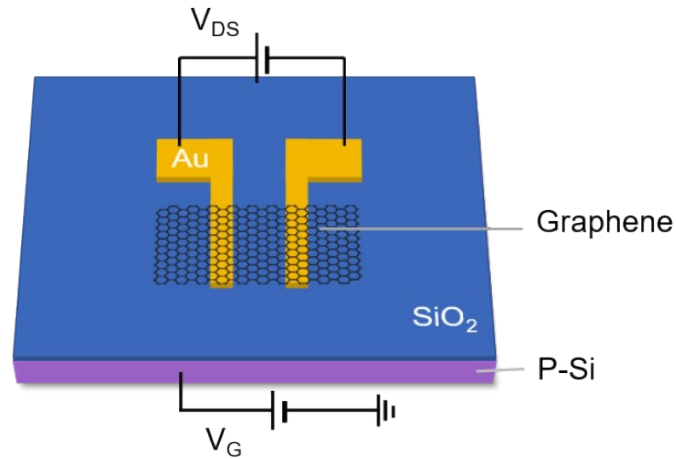

**Figure S2** Schematic diagram of Au/Gr/Au optoelectronic devices.

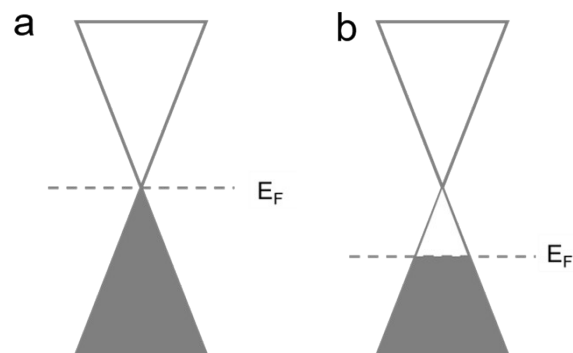

**Figure S3** (a) Schematic diagram of intrinsic graphene energy bands. (b) Schematic diagram of P-type doped graphene energy bands.

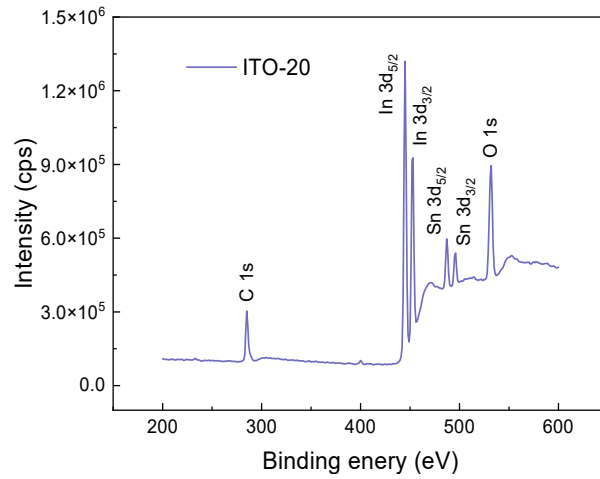

**Figure S4** XPS full spectrum of ITO thin film with an oxygen flow rate of 20 sccm.

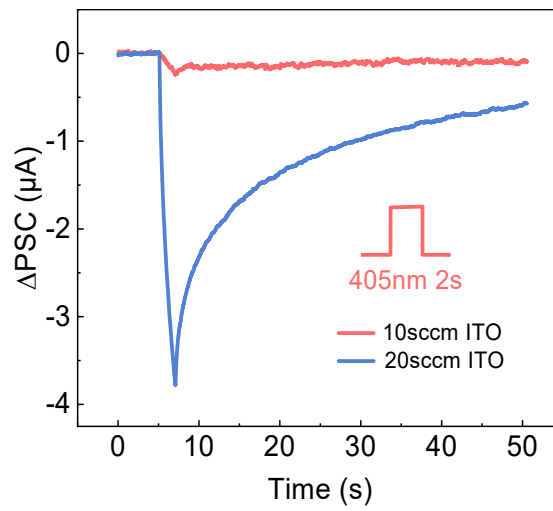

**Figure S5.** IPSC triggered by ITO graphene synapses with oxygen flow rates of 10 sccm and 20 sccm under ultraviolet light (405 nm, 2 s, 198 mWcm<sup>-2</sup>).

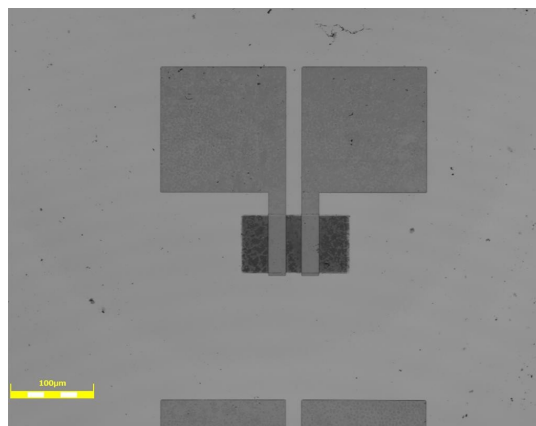

**Figure S6** Confocal Microscopic Images of Au/ITO-Gr/Au Devices.

## Reference

- (1) Malard, L. M.; Pimenta, M. A.; Dresselhaus, G.; Dresselhaus, M. S. Raman spectroscopy in graphene. *Physics Reports* **2009**, *473* (5-6), 51-87. DOI: 10.1016/j.physrep.2009.02.003.
